# Supplementary material
Source: HighWire-hosted journal article supplement (http://www.cmaj.ca/highwire/filestream/79029/field_highwire_adjunct_files/1/202756-res-2-at.pdf)

**Appendix 2: Rolling 14-day COVID-10 case count, by Public Health Unit Region, Ontario, Mar 1-Dec. 18 2020**

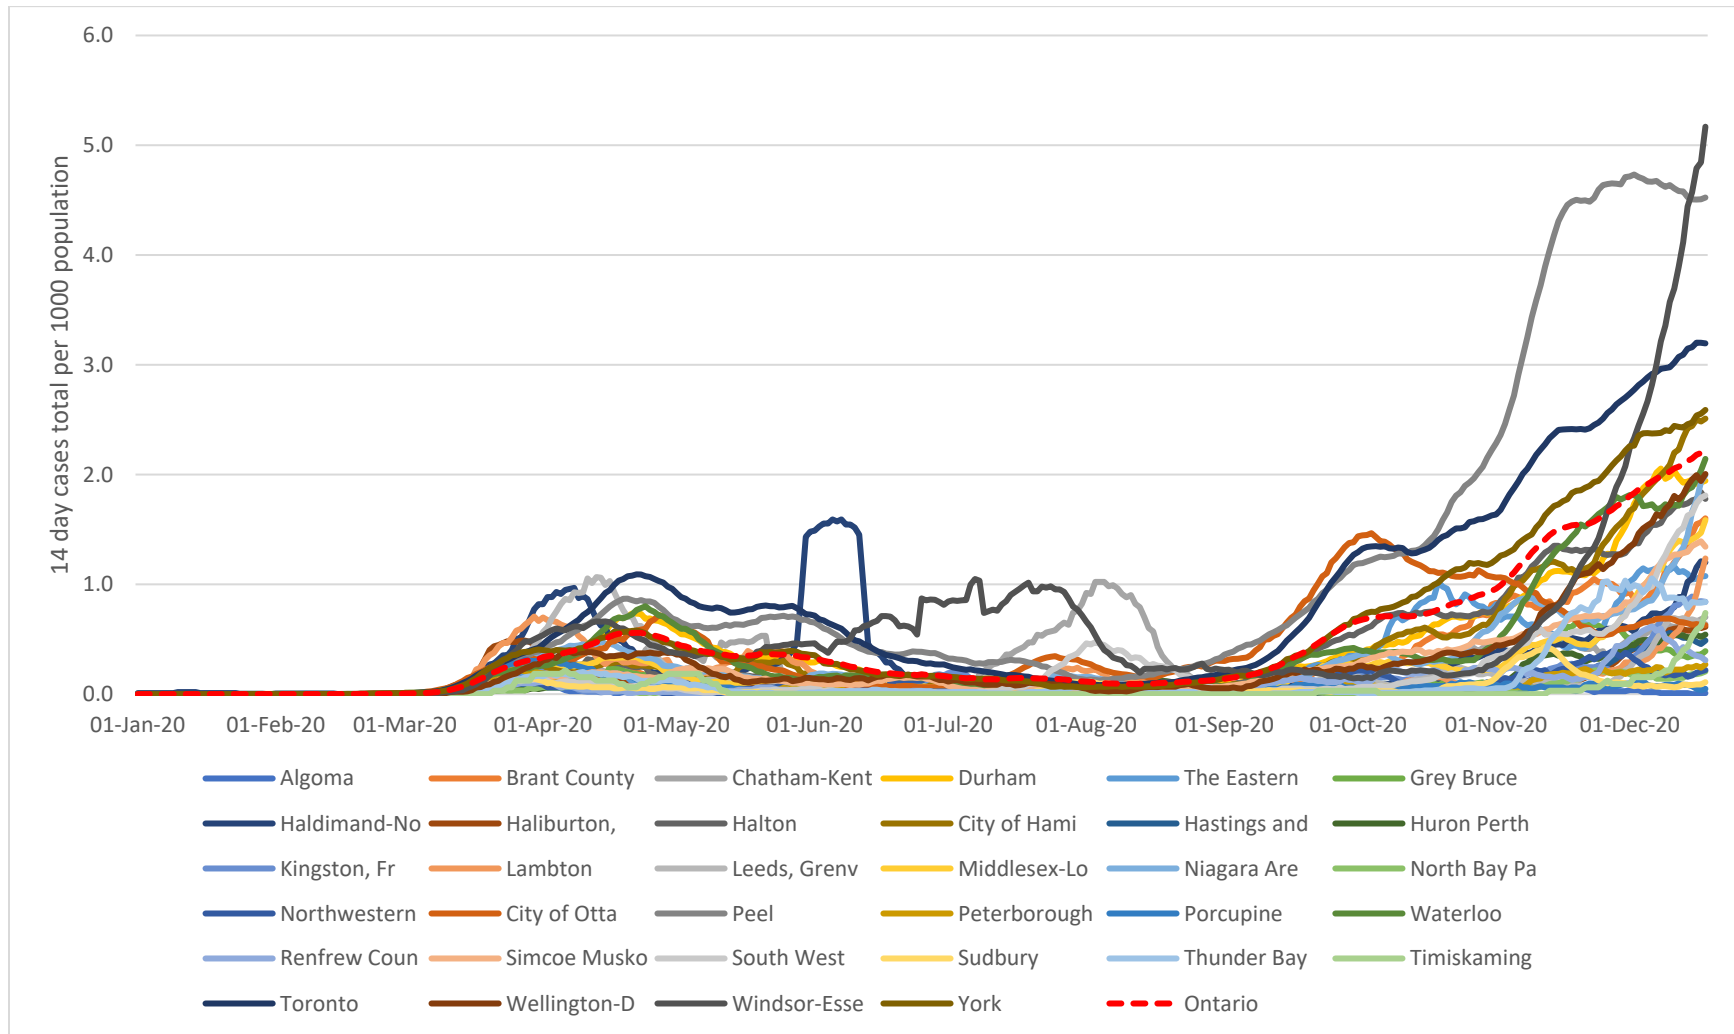

Supplement: 202756-res-2-at.pdf [file 202756-res-2-at.pdf]
